# Supplementary material
Source: MDPI journal article supplement (https://www.mdpi.com/1424-2818/14/6/460)
Supplement: s1 [file s1]

## Supplementary materials

**Table S1.** Two-way ANOVA of chemical and physical parameters by year and season. Significance is highlighted in bold ( $n=120$  for all comparisons).

| Parameter                    | Source        | d.f. | SS     | MS     | F       | p-level          |
|------------------------------|---------------|------|--------|--------|---------|------------------|
| Depth                        | Year          | 1    | 2.060  | 2.059  | 6.470   | 0.055            |
|                              | Season        | 3    | 1.180  | 0.394  | 1.238   | 0.297            |
|                              | Year x Season | 3    | 0.130  | 0.045  | 0.141   | 0.936            |
| Temperature                  | Year          | 1    | 0.158  | 0.158  | 18.720  | <b>&lt;0.001</b> |
|                              | Season        | 3    | 2.280  | 0.760  | 90.300  | <b>&lt;0.001</b> |
|                              | Year x Season | 3    | 0.442  | 0.147  | 17.500  | <b>&lt;0.001</b> |
| Dissolved oxygen             | Year          | 1    | 0.605  | 0.605  | 21.979  | <b>&lt;0.001</b> |
|                              | Season        | 3    | 1.605  | 0.535  | 19.447  | <b>&lt;0.001</b> |
|                              | Year x Season | 3    | 0.557  | 0.186  | 6.754   | <b>&lt;0.001</b> |
| pH                           | Year          | 1    | 0.681  | 0.681  | 817.720 | <b>&lt;0.001</b> |
|                              | Season        | 3    | 0.148  | 0.049  | 59.360  | <b>&lt;0.001</b> |
|                              | Year x Season | 3    | 0.071  | 0.024  | 28.390  | <b>&lt;0.001</b> |
| Conductivity                 | Year          | 1    | 0.970  | 0.970  | 129.630 | <b>&lt;0.001</b> |
|                              | Season        | 3    | 0.108  | 0.036  | 4.793   | <b>&lt;0.001</b> |
|                              | Year x Season | 3    | 0.129  | 0.043  | 5.743   | <b>&lt;0.001</b> |
| Soča River hydrometric level | Year          | 1    | 0.800  | 0.800  | 164.704 | <b>&lt;0.001</b> |
|                              | Season        | 3    | 0.130  | 0.043  | 8.913   | <b>&lt;0.001</b> |
|                              | Year x Season | 3    | 0.012  | 0.004  | 0.833   | 0.477            |
| Rainfall                     | Year          | 1    | 36.190 | 36.190 | 58.327  | <b>&lt;0.001</b> |
|                              | Season        | 3    | 5.210  | 1.740  | 2.798   | 0.041            |
|                              | Year x Season | 3    | 4.990  | 1.660  | 2.682   | 0.048            |

**Table S2.** Correlations (highest values of Pearson coefficient in bold,  $p<0.001$ ) between parameters and PCA axes (first three axes are shown).

| Parameter                 | PC1          | PC2           | PC3           |
|---------------------------|--------------|---------------|---------------|
| Depth                     | 0.488        | 0.416         | <b>-0.665</b> |
| Temperature               | -0.359       | <b>0.693</b>  | 0.515         |
| Dissolved oxygen          | -0.302       | <b>-0.785</b> | 0.007         |
| pH                        | <b>0.660</b> | -0.482        | 0.130         |
| Conductivity              | <b>0.820</b> | 0.043         | 0.136         |
| Rainfall                  | <b>0.740</b> | 0.094         | 0.363         |
| Soča                      | <b>0.895</b> | 0.024         | 0.074         |
| Explained variability (%) | 41.64        | 21.62         | 12.68         |
| Cumulative proportion (%) | 41.64        | 63.26         | 75.93         |

**Table S3.** Results of the Kruskal Wallis nonparametric test and of the Conover-Iman test for the seasonal comparisons between the values of the community indices calculated from the 2021-2022 dataset. Significance is enlightened in bold.

| Number of observed taxa: Kruskal-Wallis chi-squared = 9.4549, df = 3, <i>p</i> -value = 0.02 |              |        |        |        |
|----------------------------------------------------------------------------------------------|--------------|--------|--------|--------|
|                                                                                              | Spring       | Summer | Autumn | Winter |
| Spring                                                                                       |              | -2.596 | -2.451 | -2.886 |
| Summer                                                                                       | <b>0.006</b> |        | 0.145  | -0.290 |
| Autumn                                                                                       | <b>0.009</b> | 0.443  |        | -0.435 |
| Winter                                                                                       | <b>0.003</b> | 0.387  | 0.333  |        |

  

| Shannon-Wiener Index: Kruskal-Wallis chi-squared = 32.5973, df = 3, <i>p</i> -value <0.001 |                  |              |              |        |
|--------------------------------------------------------------------------------------------|------------------|--------------|--------------|--------|
|                                                                                            | Spring           | Summer       | Autumn       | Winter |
| Spring                                                                                     |                  | -5.002       | -6.098       | -7.932 |
| Summer                                                                                     | <b>&lt;0.001</b> |              | -1.096       | -2.931 |
| Autumn                                                                                     | <b>&lt;0.001</b> | 0.139        |              | -1.835 |
| Winter                                                                                     | <b>&lt;0.001</b> | <b>0.002</b> | <b>0.036</b> |        |

  

| Evenness: Kruskal-Wallis chi-squared = 12.6131, df = 3, <i>p</i> -value = 0.01 |                  |        |        |        |
|--------------------------------------------------------------------------------|------------------|--------|--------|--------|
|                                                                                | Spring           | Summer | Autumn | Winter |
| Spring                                                                         |                  | -2.171 | -2.808 | -3.750 |
| Summer                                                                         | <b>0.017</b>     |        | -0.638 | -1.579 |
| Autumn                                                                         | <b>0.003</b>     | 0.263  |        | -0.942 |
| Winter                                                                         | <b>&lt;0.001</b> | 0.060  | 0.175  |        |

  

| Dominance: Kruskal-Wallis chi-squared = 30.4007, df = 3, <i>p</i> -value <0.001 |                  |                  |        |        |
|---------------------------------------------------------------------------------|------------------|------------------|--------|--------|
|                                                                                 | Spring           | Summer           | Autumn | Winter |
| Spring                                                                          |                  | 3.920            | 5.793  | 7.285  |
| Summer                                                                          | <b>&lt;0.001</b> |                  | 1.872  | 3.365  |
| Autumn                                                                          | <b>&lt;0.001</b> | 0.033            |        | 1.492  |
| Winter                                                                          | <b>&lt;0.001</b> | <b>&lt;0.001</b> | 0.071  |        |

**Table S4.** Results of the Wilcoxon nonparametric test for the comparisons of the community indices values between autumn 2016-17 and 2021-22, between spring 2016-17 and 2021-22 and between values seasonally observed (spring and autumn) in the 2016-2017-period. Significance is enlightened in bold.

|                      | Autumn: 2016-17 vs 2021-22 |                 | Spring: 2016-17 vs 2021-22 |                 |
|----------------------|----------------------------|-----------------|----------------------------|-----------------|
|                      | <i>W</i>                   | <i>p</i> -value | <i>W</i>                   | <i>p</i> -value |
| Number of Taxa       | 19.5                       | <b>0.005</b>    | 52.5                       | 0.045           |
| Shannon Wiener index | 19.0                       | <b>0.003</b>    | 158.0                      | <b>0.004</b>    |
| Evenness             | 90.0                       | <b>0.194</b>    | 153.0                      | <b>0.010</b>    |
| Dominance            | 104.0                      | <b>0.030</b>    | 44.0                       | <b>0.013</b>    |

  

| 2016-17: Autumn vs Spring |          |                 |
|---------------------------|----------|-----------------|
|                           | <i>W</i> | <i>p</i> -value |
| Number of Taxa            | 46.5     | 0.715           |
| Shannon Wiener index      | 48.5     | 0.828           |
| Evenness                  | 66.0     | 0.336           |
| Dominance                 | 51.0     | 0.972           |

**Table S5.** Seasonal percentage frequencies of macrobenthic invertebrate taxa collected via leaf bags technique in Doberdò Lake.

| Class/order   | Family/genus                | FFG                 | Spring | Summer | Autumn | Winter |
|---------------|-----------------------------|---------------------|--------|--------|--------|--------|
| Tricladida    | <i>Dugesia</i>              | Predators           | 0.06   | 4.70   | 1.01   | 2.41   |
|               | <i>Dendrocoelum</i>         | Predators           | 0.24   | 1.37   | 1.53   | 1.76   |
|               | <i>Polycelis</i>            | Predators           | 0.32   | 3.85   | 0.68   | 5.06   |
| Oligochaeta   | Naididae                    |                     |        |        |        |        |
|               | Naidinae                    |                     |        |        |        |        |
|               | <i>Uncinaiis</i>            | Collector-gatherers |        | 0.01   | 0.01   | 0.07   |
|               | <i>Stilaria</i>             | Collector-gatherers | 0.06   | 0.57   | 0.26   | 0.58   |
|               | Tubificinae                 |                     |        |        |        |        |
|               | <i>Limnodrilus</i>          | Collector-gatherers | 0.13   | 2.23   | 0.68   | 0.67   |
|               | <i>Potamothrinx</i>         | Collector-gatherers | 0.02   | 0.32   | 0.29   | 0.18   |
|               | <i>Psammoryctides</i>       | Collector-gatherers |        | 0.01   | 0.03   |        |
|               | <i>Tubifex</i>              | Collector-gatherers | 0.06   | 0.54   | 0.31   | 0.03   |
|               | Lumbricidae                 |                     |        |        |        |        |
|               | <i>Eiseniella tetraedra</i> | Collector-gatherers | <0.01  |        |        |        |
| Hirudinea     | Lumbriculidae               | Collector-gatherers | 0.01   | 0.14   | 0.10   |        |
|               | <i>Erpobdella</i>           | Predators           | 1.92   | 4.05   | 15.89  | 9.30   |
|               | <i>Glossiphonia</i>         | Predators           | 0.09   | 0.22   | 1.12   | 0.18   |
|               | <i>Hemiclepsis</i>          | Predators           | 0.04   | 0.70   | 0.75   | 0.51   |
|               | <i>Protoclepsis</i>         | Predators           |        |        | 0.07   | 0.01   |
| Arachnida     | Hydracarina                 | Predators           | 0.03   | 4.41   | 0.49   | 0.61   |
| Malacostraca  | <i>Asellus</i>              | Shredders           | 78.23  | 51.99  | 23.73  | 22.53  |
|               | <i>Gammarus</i>             | Shredders           | 14.65  | 2.26   | 4.88   | 4.62   |
|               | <i>Niphargus</i>            | Shredders           | 0.34   |        | 1.63   | 2.04   |
| Bivalvia      | <i>Sphaerium</i>            | Collector-filterers | 0.01   | 0.22   | 0.16   | 0.54   |
| Gastropoda    | <i>Bithynia</i>             | Scrapers            | 0.29   | 0.60   | 1.22   | 1.41   |
|               | <i>Gyraulus</i>             | Scrapers            | 0.05   | 0.53   | 1.25   | 0.36   |
|               | <i>Lymnaea</i>              | Scrapers            |        |        | 0.03   |        |
|               | <i>Physa</i>                | Scrapers            | <0.01  | 0.01   |        | 0.01   |
|               | <i>Planorbis</i>            | Scrapers            | 0.06   | 0.07   | 0.16   | 0.39   |
|               | <i>Theodoxus</i>            | Scrapers            |        | 0.01   |        |        |
|               | <i>Emmericia</i>            | Scrapers            |        | 0.06   | 0.07   | 0.06   |
|               | <i>Valvata</i>              | Scrapers            | 0.17   | 0.51   | 1.62   | 1.00   |
| Class/order   | Family/genus                | FFG                 | Spring | Summer | Autumn | Winter |
| Hexapoda      |                             |                     |        |        |        |        |
| Coleoptera    | <i>Hydroporus</i>           | Predators           |        | 0.01   |        | 0.03   |
|               | <i>Dryops</i>               | Shredders           |        |        |        | 0.01   |
|               | <i>Elmis</i>                | Collector-gatherers | 0.02   | 0.10   | 0.19   | 0.24   |
|               | <i>Halipilus</i>            | Shredders           | 0.04   | 0.27   | 0.81   | 0.44   |
|               | Hydrophilidae               | Predators           | <0.01  | 0.01   | 0.03   |        |
| Ephemeroptera | Gyrinidae                   | Predators           |        |        | 0.04   |        |
|               | <i>Baetis</i>               | Collector-gatherers |        | 0.03   | 0.01   | 0.01   |
|               | <i>Ephemerella</i>          | Collector-gatherers |        | 0.33   |        |        |
| Diptera       | Ceratopogonidae             |                     |        |        |        |        |
|               | <i>Palpomyia</i>            | Predators           | 0.68   | 12.80  | 26.50  | 15.20  |
|               | Chironomidae                | Collector-gatherers |        |        |        |        |
|               | Tanypodinae                 | Predators           | 0.07   | 0.24   | 4.26   | 0.58   |
|               | Chironominae                | Collector-gatherers | 1.69   | 4.96   | 5.46   | 18.30  |
|               | Orthoclaudiinae             | Collector-gatherers | 0.19   | 0.81   | 2.40   | 4.55   |
|               | Empididae                   | Predators           |        | 0.02   |        | 0.01   |
|               | Athericidae                 | Predators           | 0.01   |        |        |        |
|               | Muscidae                    |                     |        |        |        |        |
|               | <i>Limnophora</i>           | Predators           |        | 0.01   |        |        |
|               | Simuliidae                  | Collector-filterers | <0.01  | 0.21   | 0.15   |        |
|               | Tabanidae                   | Predators           | <0.01  |        | 0.03   | 0.03   |
|               | Tipuliidae                  | Shredders/Predators |        |        | 0.03   |        |
| Heteroptera   | <i>Hebrus</i>               | Predators           | 0.05   | 0.22   |        |        |
| Odonata       | <i>Anax</i>                 | Predators           |        |        | 0.01   |        |
|               | <i>Calopteryx</i>           | Predators           | 0.02   |        |        |        |
|               | <i>Coenagrion</i>           | Predators           | <0.01  |        | 0.10   | 0.12   |
|               | <i>Lestidae</i>             | Predators           |        |        | 0.13   |        |
|               | <i>Sympecma</i>             | Predators           | 0.01   | 0.22   |        |        |
| Trichoptera   | <i>Lepidostoma</i>          | Shredders           | 0.02   |        |        |        |
|               | Leptoceridae                | Collector-gatherers | 0.39   | 0.32   | 0.62   | 1.15   |
|               | Limnephilidae               | Shredders           | <0.01  |        |        | 0.06   |
|               | <i>Hydropsyche</i>          | Collector-filterers | <0.01  | 0.01   |        | 0.07   |
|               | <i>Hydroptila</i>           | Scrapers            |        | 0.01   | 1.24   | 4.85   |

**Table S6.** Results of the ANCOVA application to compare organic matter decomposition rates between the sampling seasons in the Doberdò Lake. F values are reported in the upper-right side and *p*-levels are reported in the lower-left side of the table, *n*=80 for all comparisons. Significant *p*-levels are highlighted in bold.

|        | Spring               | Summer               | Autumn                        | Winter                        |
|--------|----------------------|----------------------|-------------------------------|-------------------------------|
| Spring |                      | $F_{1,158} = 2.250$  | $F_{1,158} = \mathbf{17.730}$ | $F_{1,158} = \mathbf{37.320}$ |
| Summer | $p = 0.136$          |                      | $F_{1,158} = \mathbf{10.93}$  | $F_{1,158} = \mathbf{32.290}$ |
| Autumn | $p < \mathbf{0.001}$ | $p = \mathbf{0.001}$ |                               | $F_{1,158} = \mathbf{6.259}$  |
| Winter | $p < \mathbf{0.001}$ | $p < \mathbf{0.001}$ | $p = \mathbf{0.013}$          |                               |
